# Supplementary material for: Artificial Intelligence in Symptomatic Carotid Plaque Detection: A Narrative Review
Source: MDPI journal article supplement (doi:10.3390/app13074321), 2023-03-29
Supplement: s1 [file s1]

Archive with 1 entries (1 files):
- Supplementary Tables S1-S3.pdf
